# Supplementary material for: Hochleitnerite, [K(H2O)]Mn2(Ti2Fe)(PO4)4O2(H2O)10 ⋅ 4H2O, a new paulkerrite-group mineral, from the Hagendorf-Süd pegmatite, Oberpfalz, Bavaria, Germany
Source: Copernicus journal article supplement (doi:10.5194/ejm-35-635-2023), 2023-08-07

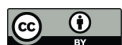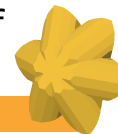

*Supplement of*

**Hochleitnerite,  $[\text{K}(\text{H}_2\text{O})]\text{Mn}_2(\text{Ti}_2\text{Fe})(\text{PO}_4)_4\text{O}_2(\text{H}_2\text{O})_{10} \cdot 4\text{H}_2\text{O}$ ,  
a new paulkerrite-group mineral, from the Hagendorf-Süd pegmatite,  
Oberpfalz, Bavaria, Germany**

Ian E. Grey et al.

*Correspondence to:* Ian E. Grey ([ian.grey@csiro.au](mailto:ian.grey@csiro.au))

The copyright of individual parts of the supplement might differ from the article licence.

## checkCIF/PLATON report

You have not supplied any structure factors. As a result the full set of tests cannot be run.

THIS REPORT IS FOR GUIDANCE ONLY. IF USED AS PART OF A REVIEW PROCEDURE FOR PUBLICATION, IT SHOULD NOT REPLACE THE EXPERTISE OF AN EXPERIENCED CRYSTALLOGRAPHIC REFEREE.

No syntax errors found.      CIF dictionary      Interpreting this report

### Datablock: I

---

|                        |                                                        |                                        |               |
|------------------------|--------------------------------------------------------|----------------------------------------|---------------|
| Bond precision:        | P- O = 0.0040 A                                        | Wavelength=0.71073                     |               |
| Cell:                  | a=10.5513 (3)                                          | b=20.6855 (7)                          | c=12.4575 (4) |
|                        | alpha=90                                               | beta=90                                | gamma=90      |
| Temperature:           | 293 K                                                  |                                        |               |
|                        | Calculated                                             | Reported                               |               |
| Volume                 | 2718.96 (15)                                           | 2718.96 (15)                           |               |
| Space group            | P b c a                                                | P b c a                                |               |
| Hall group             | -P 2ac 2ab                                             | -P -2xab;-2                            |               |
| Moiety formula         | Al0.80 Fe6.32 Mn6 O112 P16<br>Ti6.88, *** (O), 3.5 (K) | ?                                      |               |
| Sum formula            | Al0.80 Fe6.32 K3.50 Mn6<br>O132.50 P16 Ti6.88          | K Mn1.5 Fe1.67 Al0.13<br>Ti1.61 P4 O33 |               |
| Mr                     | 3786.00                                                | 951.60                                 |               |
| Dx, g cm <sup>-3</sup> | 2.312                                                  | 2.325                                  |               |
| Z                      | 1                                                      | 4                                      |               |
| Mu (mm <sup>-1</sup> ) | 2.490                                                  | 2.463                                  |               |
| F000                   | 1842.6                                                 | 1843.0                                 |               |
| F000'                  | 1852.38                                                |                                        |               |
| h, k, lmax             | 15, 30, 18                                             | 15, 30, 18                             |               |
| Nref                   | 4707                                                   | 4268                                   |               |
| Tmin, Tmax             | 0.744, 0.801                                           | 0.800, 0.900                           |               |
| Tmin'                  | 0.726                                                  |                                        |               |

Correction method= # Reported T Limits: Tmin=0.800 Tmax=0.900  
AbsCorr = GAUSSIAN

Data completeness= 0.907

Theta (max)= 31.950

R(reflections)= 0.0651( 2242)

wR2(reflections)=

wR= 0.0866( 4268)

S = 1.850

Npar= 199

---

The following ALERTS were generated. Each ALERT has the format

**test-name\_ALERT\_alert-type\_alert-level.**

Click on the hyperlinks for more details of the test.

---

### ● Alert level B

RINTA01\_ALERT\_3\_B The value of Rint is greater than 0.18

Rint given 0.214

PLAT306\_ALERT\_2\_B Isolated Oxygen Atom (H-atoms Missing ?) ..... 014 Check

PLAT306\_ALERT\_2\_B Isolated Oxygen Atom (H-atoms Missing ?) ..... 015 Check

---

### ● Alert level C

ABSMU01\_ALERT\_1\_C The ratio of given/expected absorption coefficient lies

outside the range 0.99 <> 1.01

Calculated value of mu = 2.522

Value of mu given = 2.463

ABSTY02\_ALERT\_1\_C An \_exptl\_absorpt\_correction\_type has been given without

a literature citation. This should be contained in the

\_exptl\_absorpt\_process\_details field.

Absorption correction given as gaussian

PLAT041\_ALERT\_1\_C Calc. and Reported SumFormula Strings Differ Please Check

PLAT043\_ALERT\_1\_C Calculated and Reported Mol. Weight Differ by .. 20.40 Check

PLAT077\_ALERT\_4\_C Unitcell Contains Non-integer Number of Atoms .. Please Check

PLAT127\_ALERT\_1\_C Implicit Hall Symbol Inconsistent with Explicit -P -2xab;- Check

---

### ● Alert level G

FORMU01\_ALERT\_2\_G There is a discrepancy between the atom counts in the

\_chemical\_formula\_sum and the formula from the \_atom\_site\* data.

Atom count from \_chemical\_formula\_sum: Al0.13 Fe1.67 K1 Mn1.5 O33 P4 Ti

Atom count from the \_atom\_site data: Al0.2 Fe1.58 K0.876 Mn1.5 O33.12

CELLZ01\_ALERT\_1\_G Difference between formula and atom\_site contents detected.

CELLZ01\_ALERT\_1\_G ALERT: Large difference may be due to a

symmetry error - see SYMMG tests

From the CIF: \_cell\_formula\_units\_Z 4

From the CIF: \_chemical\_formula\_sum K Mn1.5 Fe1.67 Al0.13 Ti1.61 P4 O3

TEST: Compare cell contents of formula and atom\_site data

| atom | Z*formula | cif sites | diff |
|------|-----------|-----------|------|
|------|-----------|-----------|------|

|   |      |      |      |
|---|------|------|------|
| K | 4.00 | 3.50 | 0.50 |
|---|------|------|------|

|    |      |      |      |
|----|------|------|------|
| Mn | 6.00 | 6.00 | 0.00 |
|----|------|------|------|

|    |      |      |      |
|----|------|------|------|
| Fe | 6.68 | 6.32 | 0.36 |
|----|------|------|------|

|    |      |      |       |
|----|------|------|-------|
| Al | 0.52 | 0.80 | -0.28 |
|----|------|------|-------|

|    |      |      |       |
|----|------|------|-------|
| Ti | 6.44 | 6.88 | -0.44 |
|----|------|------|-------|

|   |       |       |      |
|---|-------|-------|------|
| P | 16.00 | 16.00 | 0.00 |
|---|-------|-------|------|

|   |        |        |       |
|---|--------|--------|-------|
| O | 132.00 | 132.50 | -0.50 |
|---|--------|--------|-------|

PLAT004\_ALERT\_5\_G Polymeric Structure Found with Maximum Dimension 2 Info

PLAT005\_ALERT\_5\_G No Embedded Refinement Details Found in the CIF Please Do !

PLAT017\_ALERT\_1\_G Check Scattering Type Consistency of F as 0

PLAT020\_ALERT\_3\_G The Value of Rint is Greater Than 0.12 ..... 0.214 Report

|                   |                                                  |                |              |
|-------------------|--------------------------------------------------|----------------|--------------|
| PLAT045_ALERT_1_G | Calculated and Reported Z Differ by a Factor ... | 0.250          | Check        |
| PLAT068_ALERT_1_G | Reported F000 Differs from Calcd (or Missing)... |                | Please Check |
| PLAT112_ALERT_2_G | ADDSYM Detects New (Pseudo) Symm. Elem           | A              | 88 %Fit      |
| PLAT199_ALERT_1_G | Reported _cell_measurement_temperature ..... (K) | 293            | Check        |
| PLAT200_ALERT_1_G | Reported _diffrn_ambient_temperature ..... (K)   | 293            | Check        |
| PLAT300_ALERT_4_G | Atom Site Occupancy of Mn1                       | Constrained at | 0.75 Check   |
| PLAT300_ALERT_4_G | Atom Site Occupancy of Fe1                       | Constrained at | 0.25 Check   |
| PLAT300_ALERT_4_G | Atom Site Occupancy of Al2                       | Constrained at | 0.1 Check    |
| PLAT301_ALERT_3_G | Main Residue Disorder .....(Resd 1 )             |                | 16% Note     |
| PLAT302_ALERT_4_G | Anion/Solvent/Minor-Residue Disorder (Resd 2 )   |                | 100% Note    |
| PLAT302_ALERT_4_G | Anion/Solvent/Minor-Residue Disorder (Resd 5 )   |                | 100% Note    |
| PLAT311_ALERT_2_G | Isolated Disordered Oxygen Atom (No H's ?) ..... |                | Ow Check     |
| PLAT720_ALERT_4_G | Number of Unusual/Non-Standard Labels .....      |                | 2 Note       |
| PLAT808_ALERT_5_G | No Parseable SHELXL Style Weighting Scheme Found |                | Please Check |
| PLAT883_ALERT_1_G | No Info/Value for _atom_sites_solution_primary . |                | Please Do !  |
| PLAT966_ALERT_5_G | Note: Non-Standard (i.e. 2.0) OMIT Threshold of  |                | 3.0 Sig(I)   |
| PLAT982_ALERT_1_G | The Al-f' = 0.0659 Deviates from IT-value =      | 0.0645         | Check        |
| PLAT982_ALERT_1_G | The Fe-f' = 0.3486 Deviates from IT-value =      | 0.3463         | Check        |
| PLAT982_ALERT_1_G | The K-f' = 0.2025 Deviates from IT-value =       | 0.2009         | Check        |
| PLAT982_ALERT_1_G | The Mn-f' = 0.3394 Deviates from IT-value =      | 0.3368         | Check        |
| PLAT982_ALERT_1_G | The P-f' = 0.1041 Deviates from IT-value =       | 0.1023         | Check        |
| PLAT982_ALERT_1_G | The Ti-f' = 0.2808 Deviates from IT-value =      | 0.2776         | Check        |
| PLAT983_ALERT_1_G | The Al-f" = 0.0527 Deviates from IT-Value =      | 0.0514         | Check        |
| PLAT983_ALERT_1_G | The Fe-f" = 0.8535 Deviates from IT-Value =      | 0.8444         | Check        |
| PLAT983_ALERT_1_G | The K-f" = 0.2536 Deviates from IT-Value =       | 0.2494         | Check        |
| PLAT983_ALERT_1_G | The Mn-f" = 0.7370 Deviates from IT-Value =      | 0.7283         | Check        |
| PLAT983_ALERT_1_G | The P-f" = 0.0961 Deviates from IT-Value =       | 0.0942         | Check        |
| PLAT983_ALERT_1_G | The Ti-f" = 0.4522 Deviates from IT-Value =      | 0.4457         | Check        |

---

0 **ALERT level A** = Most likely a serious problem - resolve or explain  
3 **ALERT level B** = A potentially serious problem, consider carefully  
6 **ALERT level C** = Check. Ensure it is not caused by an omission or oversight  
35 **ALERT level G** = General information/check it is not something unexpected

25 ALERT type 1 CIF construction/syntax error, inconsistent or missing data  
5 ALERT type 2 Indicator that the structure model may be wrong or deficient  
3 ALERT type 3 Indicator that the structure quality may be low  
7 ALERT type 4 Improvement, methodology, query or suggestion  
4 ALERT type 5 Informative message, check

---

## Validation response form

Please find below a validation response form (VRF) that can be filled in and pasted into your CIF.

```
# start Validation Reply Form
_vrf_RINTA01_I
;
PROBLEM: The value of Rint is greater than 0.18
RESPONSE: ...
;
_vrf_ABSMU01_I
;
PROBLEM: The ratio of given/expected absorption coefficient lies
RESPONSE: ...
;
```

```
_vrf_ABSTY02_I
;
PROBLEM: An _exptl_absorpt_correction_type has been given without
RESPONSE: ...
;
_vrf_PLAT306_I
;
PROBLEM: Isolated Oxygen Atom (H-atoms Missing ?) .....      014 Check
RESPONSE: ...
;
_vrf_PLAT041_I
;
PROBLEM: Calc. and Reported SumFormula   Strings   Differ      Please Check
RESPONSE: ...
;
_vrf_PLAT043_I
;
PROBLEM: Calculated and Reported Mol. Weight Differ by ..      20.40 Check
RESPONSE: ...
;
_vrf_PLAT077_I
;
PROBLEM: Unitcell Contains Non-integer Number of Atoms ..      Please Check
RESPONSE: ...
;
_vrf_PLAT127_I
;
PROBLEM: Implicit Hall Symbol   Inconsistent with Explicit -P -2xab;- Check
RESPONSE: ...
;
# end Validation Reply Form
```

---

It is advisable to attempt to resolve as many as possible of the alerts in all categories. Often the minor alerts point to easily fixed oversights, errors and omissions in your CIF or refinement strategy, so attention to these fine details can be worthwhile. In order to resolve some of the more serious problems it may be necessary to carry out additional measurements or structure refinements. However, the purpose of your study may justify the reported deviations and the more serious of these should normally be commented upon in the discussion or experimental section of a paper or in the "special\_details" fields of the CIF. checkCIF was carefully designed to identify outliers and unusual parameters, but every test has its limitations and alerts that are not important in a particular case may appear. Conversely, the absence of alerts does not guarantee there are no aspects of the results needing attention. It is up to the individual to critically assess their own results and, if necessary, seek expert advice.

### **Publication of your CIF in IUCr journals**

A basic structural check has been run on your CIF. These basic checks will be run on all CIFs submitted for publication in IUCr journals (*Acta Crystallographica*, *Journal of Applied Crystallography*, *Journal of Synchrotron Radiation*); however, if you intend to submit to *Acta Crystallographica Section C* or *E* or *IUCrData*, you should make sure that full publication checks are run on the final version of your CIF prior to submission.

### **Publication of your CIF in other journals**

Please refer to the *Notes for Authors* of the relevant journal for any special instructions relating to CIF submission.

---

**PLATON version of 28/11/2022; check.def file version of 28/11/2022**

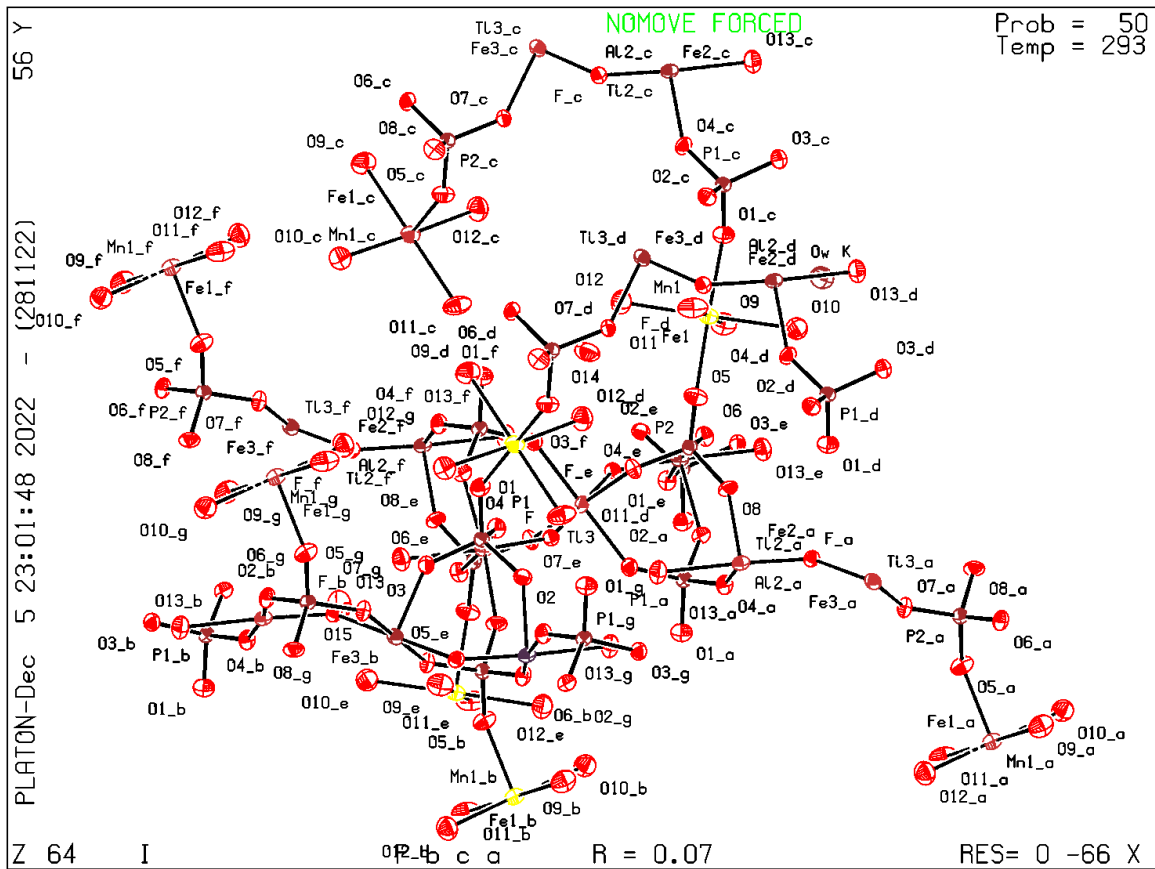

Supplement: Supplementary file 1 [file ejm-35-635-2023-supplement.pdf]
